# Supplementary material for: Migratory insertion in N-heterocyclic carbene complexes of palladium; an experimental and DFT studyElectronic supplementary information (ESI) available: experimental; structural data for 1; computational data. See http://www.rsc.org/suppdata/cc/b2/b212453j/
Source: Royal Society of Chemistry journal article supplement (doi:10.1039/b212453j), 2003-02-24
Supplement: b212453j.doc [file b212453j.doc]

Migrative Insertion in N-heterocyclic Carbene Complexes of Palladium; an Experimental and DFT Study

Andreas A. Danopoulos,*a Nikolaos Tsoureas,a Jennifer C. Green*b and Michael B. Hursthouse

a Department of Chemistry, University of Southampton, Highfield, Southampton, SO17 1BJ, UK; e-mail: [ad1@soton.ac.uk](mailto:ad1@soton.ac.uk)

b Inorganic Chemistry Laboratory, University of Oxford, South Parks Road, Oxford,OX1 3QR, UK; e-mail: Jennifer.Green@chem.ox.ac.uk

# Supporting Information

|  | Page |
| --- | --- |
| I. Experimental | S-2 |
| II. Structural data for 1 | S-3 |
| III. Computational data | S-12 |

**I. Experimental - General information**

Elemental analyses were carried out by the University College London Microanalytical Laboratory. NMR data were recorded on Bruker AMX-300 and DPX-400 spectrometers, operating at 300 and 400MHz (1H), respectively. The spectra were referenced internally using the signal from the residual protio-solvent (1H). Commercial chemicals were from Aldrich and Avocado. The starting materials were synthesised according to literature methods (see communication). All manipulations were carried out under nitrogen using dried and degassed solvents following well established procedures.

**Preparation of 1:** To a cold (-78oC) solution of (tmed)PdMe2 in thf (0.1g, 0.4mmol in 30cm3) was added by cannula a solution of the carbene **L** (0.26g, 0.5mmol) in the same solvent (30cm3). The orange reaction mixture was allowed to reach room temperature and was stirred for 16h. Evaporation of the volatiles under reduced pressure, washing of the residue with cold petroleum (3x30cm3), extraction into ether (50cm3), filtration, concentration and cooling of the ether extracts gave crude **1** which was contaminated by Pd(tmed)Me2. Repeated recrystallisations from ether gave the analytically and spectroscopically pure product as orange crystalline material. Yield 60-70%. Found: C, 64.52, H, 7.50, N,9.32 . Calculated for C37H47N5Pd.C4H9O; C, 65.30, H, 7.87, N, 9.76%. 1H-NMR (C6D6): -0.45(s, 3H, Pd-C*H*3), 1.05, 1.08, 1.22, 1.24, 1.32, 1.35, 1.45, 1.48 [doublets, total 24H, CH(C*H*3)2], 2.30 [s, 3H, NC(C*H*3)N], 2,72, 2.85, 3.48, 4.38 [septets, 4H, C*H*(CH3)2], 5.65 and 6.20 (doublets, 1H each, imidazolyl CH=CH), 5.95 and 6.50 (doublets, 1H each, imidazol-2-ylidene CH=CH), 7.05-7.40 (m 9H, other aromatic protons).

**II. Structural data for 1.**


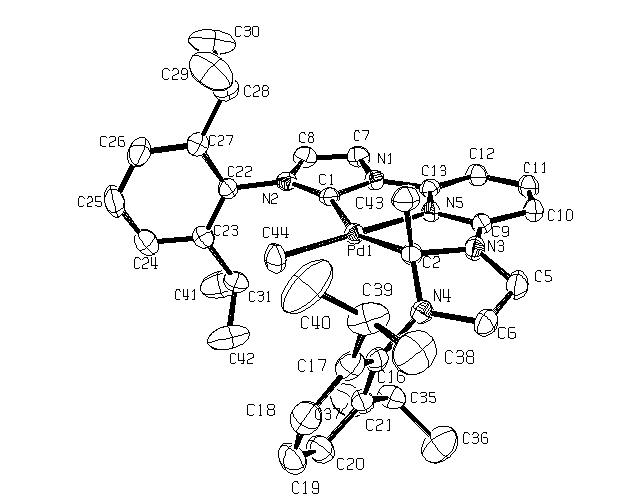


Figure S-1. ORTEP diagram of **1**. Hydrogen atoms and ether solvent molecule are omitted for clarity.

Table S-1. Crystal Data Collection Parameters.

Empirical formula C41 H57 N5 O Pd

Formula weight 742.32

Temperature 120 K

Crystal system, space group Monoclinic, P2(1)/n

Diffractometer Nonius KappaCCD Area Detector

Radiation Mo Ka ( = 0.71073 Å)

Graphite monochromated

Radiation source Nonius FR591 rotating anode

Detector Position 65 mm

Exposure Time 51 sec. per frame

Unit cell dimensions a = 8.65920(10) Å

b = 21.2788(3) Å

c = 21.3929(4) Å

beta = 93.5780(10) deg

Volume 3934.12(10) Å3

Z, Calculated density 4, 1.253 Mg/m3

Absorption coefficient 0.508 mm-1

F(000) 1568

Crystal size 0.07 x 0.04 x 0.03 mm

Crystal colour, Habit Orange, Plates

Theta range for data collection 3.02 to 27.26 deg.

Limiting indices -11<=h<=10, -27<=k<=27, -27<=l<=27

Reflections collected / unique 44801 / 8719 [R(int) = 0.0968]

Completeness to theta = 27.26 98.8 %

Absorption correction Semi-empirical from equivalents

Max. and min. transmission 0.9849 and 0.9653

Refinement method Full-matrix least-squares on F2

Data / restraints / parameters 8719 / 0 / 433

Goodness-of-fit on F2  0.999

Final R indices [I>2sigma(I)] R1 = 0.0434, wR2 = 0.0872

R indices (all data) R1 = 0.0880, wR2 = 0.1004

Largest diff. peak and hole 0.361 and -0.454 e.Å-3

Table S-2. Atomic coordinates ( x 104) and equivalent isotropic displacement parameters (Åx 103) for **1**. U(eq) is defined as one third of the trace of the orthogonalized Uij tensor.

x y z U(eq)

_________________________________________________________________________

C(35) 2580(4) -192(2) 2049(2) 58(1)

C(44) 3700(4) 1678(2) 2038(2) 60(1)

O(1) 4025(5) 2462(2) 8208(1) 112(1)

C(39) 6069(5) 664(2) 3858(2) 81(1)

C(37) 1245(5) 106(2) 1668(2) 94(2)

C(38) 6662(6) 182(3) 4342(3) 118(2)

C(41) -669(7) 1975(3) -216(2) 134(2)

C(46) 2916(8) 2238(2) 7776(2) 105(2)

C(47) 5404(7) 2649(3) 7952(3) 125(2)

C(36) 2370(7) -904(2) 2090(2) 107(2)

C(45) 1455(7) 2125(3) 8085(3) 118(2)

C(48) 6609(8) 2795(3) 8438(3) 154(3)

C(40) 6140(9) 1314(3) 4151(3) 157(3)

C(42) -480(6) 1543(3) 864(2) 115(2)

Pd(1) 4886(1) 1159(1) 1421(1) 37(1)

N(5) 6063(3) 623(1) 828(1) 38(1)

N(1) 5085(3) 1296(1) 89(1) 39(1)

N(4) 5598(3) 185(1) 2596(1) 44(1)

C(12) 6727(4) 400(2) -208(2) 9(1)

C(1) 4382(3) 1597(1) 570(1) 38(1)

C(2) 6100(3) 590(1) 2076(1) 40(1)

C(6) 6363(4) -384(2) 2576(2) 56(1)

C(9) 6891(3) 131(1) 1066(1) 41(1)

C(13) 5993(3) 754(1) 218(1) 39(1)

C(22) 2760(3) 2565(1) 563(1) 41(1)

N(2) 3666(3) 2087(1) 272(1) 39(1)

N(3) 6848(3) 84(1) 1691(1) 46(1)

C(7) 4779(4) 1597(2) - 478(1) 47(1)

C(10) 7680(4) -255(2) 657(2) 50(1)

C(27) 3495(4) 3115(2) 770(2) 50(1)

C(16) 4270(4) 269(1) 2951(1) 46(1)

C(43) 7436(4) 1003(2) 2350(2) 55(1)

C(5) 7132(4) -453(2) 2065(2) 60(1)

C(8) 3905(4) 2090(2) -369(1) 48(1)

C(23) 1176(4) 2461(2) 595(2) 56(1)

C(21) 2809(4) 88(2) 2699(1) 48(1)

C(28) 5225(4) 3219(2) 730(2) 64(1)

C(11) 7582(4) -113(2) 35(2) 53(1)

C(25) 1008(5) 3482(2) 1059(2) 84(1)

C(18) 3172(6) 540(2) 3917(2) 78(1)

C(17) 4486(5) 493(2) 3571(2) 59(1)

C(29) 5997(6) 3410(3) 1349(2) 127(2)

C(26) 2567(5) 3572(2) 1025(2) 71(1)

C(19) 1734(5) 373(2) 3670(2) 78(1)

C(31) 396(4) 1857(2) 365(2) 76(1)

C(24) 334(5) 2937(2) 856(2) 79(1)

C(20) 1549(4) 151(2) 3069(2) 67(1)

C(30) 5555(6) 3688(3) 224(3) 134(2)

___________________________________________________________________________

Table S-3. Bond lengths- angles [Å] and angles [deg] for **1** (non-hydrogen atoms).

_____________________________________________________________

C(35)-C(37) 1.512(5)

C(35)-C(21) 1.514(4)

C(35)-C(36) 1.529(6)

C(44)-Pd(1) 2.046(3)

O(1)-C(46) 1.376(6)

O(1)-C(47) 1.402(6)

C(39)-C(17) 1.512(5)

C(39)-C(40) 1.517(6)

C(39)-C(38) 1.523(6)

Tabl S-3 (cont.)

C(41)-C(31) 1.522(6)

C(46)-C(45) 1.483(7)

C(47)-C(48) 1.459(7)

C(42)-C(31) 1.504(6)

Pd(1)-N(5) 2.029(2)

Pd(1)-C(1) 2.067(3)

Pd(1)-C(2) 2.085(3)

N(5)-C(13) 1.331(3)

N(5)-C(9) 1.350(4)

N(1)-C(7) 1.383(4)

N(1)-C(1) 1.384(3)

N(1)-C(13) 1.413(4)

N(4)-C(6) 1.382(4)

N(4)-C(16) 1.429(4)

N(4)-C(2) 1.493(4)

C(12)-C(13) 1.368(4)

C(12)-C(11) 1.401(5)

C(1)-N(2) 1.352(4)

C(2)-N(3) 1.525(4)

C(2)-C(43) 1.539(4)

C(6)-C(5) 1.322(5)

C(9)-N(3) 1.343(4)

C(9)-C(10) 1.408(4)

C(22)-C(27) 1.391(4)

C(22)-C(23) 1.395(4)

C(22)-N(2) 1.450(4)

N(2)-C(8) 1.400(4)

N(3)-C(5) 1.408(4)

C(7)-C(8) 1.323(4)

C(10)-C(11) 1.362(4)

C(27)-C(26) 1.393(5)

C(27)-C(28) 1.522(5)

C(16)-C(21) 1.399(4)

C(16)-C(17) 1.409(4)

C(23)-C(24) 1.386(5)

C(23)-C(31) 1.520(5)

C(21)-C(20) 1.394(5)

C(28)-C(29) 1.502(5)

C(28)-C(30) 1.512(6)

C(25)-C(24) 1.357(6)

C(25)-C(26) 1.370(6)

C(18)-C(19) 1.369(6)

C(18)-C(17) 1.400(5)

C(37)-C(35)-C(21) 112.5(3)

C(37)-C(35)-C(36) 110.9(4)

C(21)-C(35)-C(36) 110.3(3)

C(46)-O(1)-C(47) 114.3(4)

C(17)-C(39)-C(40) 113.6(4)

C(17)-C(39)-C(38) 111.9(3)

C(40)-C(39)-C(38) 109.2(4)

O(1)-C(46)-C(45) 109.6(4)

O(1)-C(47)-C(48) 111.7(5)

N(5)-Pd(1)-C(44) 178.32(12)

N(5)-Pd(1)-C(1) 77.79(10)

C(44)-Pd(1)-C(1) 103.76(12)

N(5)-Pd(1)-C(2) 80.95(10)

C(44)-Pd(1)-C(2) 97.59(12)

C(1)-Pd(1)-C(2) 157.38(11)

C(13)-N(5)-C(9) 121.6(2)

C(13)-N(5)-Pd(1) 120.09(19)

C(9)-N(5)-Pd(1) 118.32(19)

C(7)-N(1)-C(1) 111.7(2)

C(7)-N(1)-C(13) 128.5(2)

C(1)-N(1)-C(13) 119.8(2)

C(6)-N(4)-C(16) 122.0(3)

C(6)-N(4)-C(2) 108.7(2)

C(16)-N(4)-C(2) 127.2(2)

C(13)-C(12)-C(11) 116.1(3)

N(2)-C(1)-N(1) 102.4(2)

N(2)-C(1)-Pd(1) 145.9(2)

Table S-3 (cont.)

N(1)-C(1)-Pd(1) 111.60(19)

N(4)-C(2)-N(3) 98.5(2)

N(4)-C(2)-C(43) 107.1(2)

N(3)-C(2)-C(43) 105.9(2)

N(4)-C(2)-Pd(1) 132.6(2)

N(3)-C(2)-Pd(1) 105.04(17)

C(43)-C(2)-Pd(1) 105.08(19)

C(5)-C(6)-N(4) 112.9(3)

N(3)-C(9)-N(5) 112.8(3)

N(3)-C(9)-C(10) 128.3(3)

N(5)-C(9)-C(10) 118.9(3)

N(5)-C(13)-C(12) 122.8(3)

N(5)-C(13)-N(1) 110.7(2)

C(12)-C(13)-N(1) 126.5(3)

C(27)-C(22)-C(23) 123.4(3)

C(27)-C(22)-N(2) 118.6(3)

C(23)-C(22)-N(2) 117.9(3)

C(1)-N(2)-C(8) 112.0(3)

C(1)-N(2)-C(22) 125.7(2)

C(8)-N(2)-C(22) 122.3(2)

C(9)-N(3)-C(5) 127.7(3)

C(9)-N(3)-C(2) 121.6(2)

C(5)-N(3)-C(2) 109.3(2)

C(8)-C(7)-N(1) 107.0(3)

C(22)-C(27)-C(26) 116.6(3)

C(22)-C(27)-C(28) 122.4(3)

C(26)-C(27)-C(28) 121.0(3)

C(21)-C(16)-C(17) 121.3(3)

C(21)-C(16)-N(4) 119.9(3)

C(17)-C(16)-N(4) 118.6(3)

C(6)-C(5)-N(3) 107.5(3)

C(7)-C(8)-N(2) 106.9(3)

C(24)-C(23)-C(22) 116.5(3)

C(24)-C(23)-C(31) 121.0(3)

C(22)-C(23)-C(31) 122.5(3)

C(20)-C(21)-C(16) 118.4(3)

C(20)-C(21)-C(35) 119.8(3)

C(16)-C(21)-C(35) 121.8(3)

C(29)-C(28)-C(30) 111.1(4)

C(29)-C(28)-C(27) 112.0(3)

C(30)-C(28)-C(27) 111.5(3)

C(24)-C(25)-C(26) 120.5(4)

C(19)-C(18)-C(17) 121.8(4)

C(18)-C(17)-C(16) 117.2(4)

C(18)-C(17)-C(39) 120.9(3)

C(16)-C(17)-C(39) 121.8(3)

C(25)-C(26)-C(27) 121.2(4)

C(25)-C(24)-C(23) 121.8(4)

C(19)-C(20)-C(21) 121.1(4)

­­ _____________________________________________________________

Table S-4. Anisotropic displacement parameters (A2 x 103) for **1**. The anisotropic displacement factor exponent takes the form:

-2 pi2 [ h2 a*2 U11 + ... + 2 h k a* b* U12 ]

_______________________________________________________________________

U11 U22 U33 U23 U13 U12

_______________________________________________________________________

C(35) 49(2) 72(3) 53(2) -1(2) 6(2) -7(2)

C(44) 74(2) 58(2) 48(2) 0(2) 18(2) 20(2)

O(1) 143(3) 128(3) 65(2) 13(2) 7(2) -31(2)

C(39) 114(4) 89(3) 38(2) -1(2) -2(2) -30(3)

C(37) 67(3) 143(4) 70(3) 5(3) -12(2) 3(3)

Table S-4 (cont.)

C(38) 109(4) 112(4) 127(4) 14(4) -31(3) -4(3)

C(41) 169(6) 133(5) 97(4) 1(4) -10(4) -75(4)

C(46) 157(5) 79(3) 78(3) 4(3) -10(4) 0(3)

C(47) 132(5) 152(5) 93(4) 28(4) 36(4) -7(4)

C(36) 152(5) 80(3) 88(3) -20(3) -3(3) -15(3)

C(45) 142(5) 99(4) 111(4) -13(3) -16(4) 2(4)

C(48) 153(6) 197(7) 113(5) 22(5) 24(4) -73(5)

C(40) 234(8) 86(4) 142(5) -11(4) -73(5) -28(4)

C(42) 111(4) 110(4) 121(4) 42(3) -19(3) -51(3)

Pd(1) 40(1) 36(1) 35(1) 0(1) 6(1) 3(1)

N(5) 38(1) 35(1) 41(1) -5(1) 6(1) 1(1)

N(1) 42(1) 41(2) 34(1) -2(1) 5(1) 0(1)

N(4) 44(2) 41(2) 46(1) 8(1) 2(1) 3(1)

C(12) 52(2) 52(2) 44(2) -10(2) 11(2) -4(2)

C(1) 35(2) 37(2) 42(2) 3(1) 4(1) -3(1)

C(2) 41(2) 39(2) 41(2) 3(1) 5(1) 5(1)

C(6) 62(2) 47(2) 60(2) 15(2) 7(2) 12(2)

C(9) 37(2) 37(2) 50(2) -4(1) 7(1) -1(1)

C(13) 40(2) 36(2) 42(2) -6(1) 8(1) -8(1)

C(22) 42(2) 40(2) 39(2) 8(1) 4(1) 7(1)

N(2) 39(1) 40(2) 39(1) 4(1) 3(1) -2(1)

N(3) 51(2) 40(2) 49(2) 4(1) 8(1) 9(1)

C(7) 55(2) 53(2) 34(2) 1(1) 8(1) -5(2)

C(10) 46(2) 40(2) 64(2) -7(2) 9(2) 5(2)

C(27) 53(2) 47(2) 50(2) -1(2) 1(2) 1(2)

C(16) 57(2) 39(2) 43(2) 11(1) 9(2) 7(2)

C(43) 51(2) 56(2) 57(2) 6(2) -1(2) -5(2)

C(5) 68(2) 49(2) 66(2) 9(2) 13(2) 20(2)

C(8) 51(2) 56(2) 37(2) 9(2) 2(1) -1(2)

C(23) 46(2) 53(2) 71(2) 4(2) 9(2) 4(2)

C(21) 50(2) 48(2) 48(2) 10(2) 11(2) 9(2)

C(28) 58(2) 58(2) 76(2) -12(2) 1(2) 10(2)

C(11) 54(2) 47(2) 60(2) -17(2) 18(2) 0(2)

C(25) 73(3) 78(3) 101(3) -16(3) 20(2) 29(3)

C(18) 122(4) 67(3) 48(2) 0(2) 29(2) 7(3)

C(17) 85(3) 50(2) 43(2) 4(2) 5(2) -3(2)

C(29) 76(3) 211(7) 91(3) -18(4) -19(3) -8(4)

C(26) 80(3) 51(2) 81(3) -15(2) 1(2) 5(2)

C(19) 82(3) 86(3) 69(3) 10(2) 36(2) 21(2)

C(31) 41(2) 67(3) 122(4) -5(2) 16(2) -10(2)

C(24) 52(2) 80(3) 106(3) -9(3) 19(2) 8(2)

C(20) 61(2) 77(3) 66(2) 14(2) 17(2) 11(2)

C(30) 100(4) 179(6) 124(5) 46(4) 12(3) -59(4)

_______________________________________________________________________

Table S-5 Hydrogen coordinates ( x 104) and isotropic displacement parameters (A2 x 103) for **1**.

__________________________________________________________________________

x y z U(eq)

__________________________________________________________________________

H(35) 3543 -112 1827 69

H(10A) 3872 1501 2460 89

H(10B) 2592 1668 1913 89

H(10C) 4067 2114 2037 89

H(39) 6798 662 3514 97

H(37A) 1147 -89 1252 141

H(37B) 1438 557 1624 141

H(37C) 286 42 1879 141

H(38A) 7696 305 4511 176

H(38B) 6714 -232 4143 176

H(38C) 5957 163 4682 176

H(41A) -77 2167 -542 201

H(41B) -1505 2260 -111 201

H(41C) -1111 1576 -369 201

H(20A) 3277 1841 7592 126

H(20B) 2736 2548 7434 126

H(20C) 5202 3025 7686 149

Table S-5 (cont.)

H(20D) 5769 2309 7683 149

H(36A) 2230 -1080 1667 161

H(36B) 1457 -998 2322 161

H(36C) 3288 -1091 2307 161

H(20E) 668 1964 7777 177

H(20F) 1095 2520 8261 177

H(20G) 1638 1817 8422 177

H(20H) 7550 2927 8242 231

H(20I) 6830 2422 8695 231

H(20J) 6256 3136 8702 231

H(40A) 7196 1397 4323 236

H(40B) 5426 1334 4489 236

H(40C) 5845 1629 3832 236

H(42A) -942 1152 699 173

H(42B) -1299 1825 992 173

H(42C) 230 1449 1227 173

H(12) 6660 497 -642 59

H(6) 6340 -693 2895 67

H(7) 5129 1473 -872 57

H(10) 8266 -606 810 60

H(0A) 7801 1276 2021 82

H(0B) 8287 734 2513 82

H(0C) 7072 1262 2690 82

H(5) 7761 -801 1968 73

H(8) 3514 2389 -668 58

H(28) 5687 2808 611 77

H(11) 8112 -371 -244 64

H(25) 393 3803 1226 100

H(18) 3280 693 4335 94

H(29A) 7107 3469 1304 190

H(29B) 5842 3082 1660 190

H(29C) 5545 3805 1487 190

H(26) 3023 3953 1177 85

H(19) 862 411 3916 93

H(31) 1225 1560 245 92

H(24) -744 2880 895 94

H(20) 545 38 2902 81

H(30A) 6676 3740 206 201

H(30B) 5085 4093 318 201

H(30C) 5117 3534 -181 201

_________________________________________________________________________

Table S-6. Bond Lengths (Å) and angles (o) for hydrogen atoms for **1**.

C(39)-H(39) 1.0000

C(37)-H(37A) 0.9800

C(37)-H(37B) 0.9800

C(37)-H(37C) 0.9800

C(38)-H(38A) 0.9800

C(38)-H(38B) 0.9800

C(38)-H(38C) 0.9800

C(41)-H(41A) 0.9800

C(41)-H(41B) 0.9800

C(41)-H(41C) 0.9800

C(46)-H(20A) 0.9900

C(46)-H(20B) 0.9900

C(47)-H(20C) 0.9900

C(47)-H(20D) 0.9900

C(36)-H(36A) 0.9800

C(36)-H(36B) 0.9800

C(36)-H(36C) 0.9800

C(45)-H(20E) 0.9800

C(45)-H(20F) 0.9800

C(45)-H(20G) 0.9800

C(48)-H(20H) 0.9800

C(48)-H(20I) 0.9800

C(48)-H(20J) 0.9800

C(40)-H(40A) 0.9800

C(40)-H(40B) 0.9800

C(40)-H(40C) 0.9800

C(42)-H(42A) 0.9800

C(42)-H(42B) 0.9800

C(42)-H(42C) 0.9800

C(12)-H(12) 0.9500

C(7)-H(7) 0.9500

C(10)-H(10) 0.9500

C(39)-H(39) 1.0000

C(37)-H(37A) 0.9800

C(37)-H(37B) 0.9800

C(37)-H(37C) 0.9800

C(38)-H(38A) 0.9800

C(38)-H(38B) 0.9800

C(38)-H(38C) 0.9800

C(41)-H(41A) 0.9800

C(41)-H(41B) 0.9800

C(41)-H(41C) 0.9800

C(46)-H(20A) 0.9900

C(46)-H(20B) 0.9900

C(47)-H(20C) 0.9900

C(47)-H(20D) 0.9900

C(36)-H(36A) 0.9800

C(36)-H(36B) 0.9800

C(36)-H(36C) 0.9800

C(45)-H(20E) 0.9800

C(45)-H(20F) 0.9800

C(45)-H(20G) 0.9800

C(48)-H(20H) 0.9800

C(48)-H(20I) 0.9800

C(48)-H(20J) 0.9800

C(40)-H(40A) 0.9800

C(40)-H(40B) 0.9800

C(40)-H(40C) 0.9800

C(42)-H(42A) 0.9800

C(42)-H(42B) 0.9800

C(42)-H(42C) 0.9800

C(12)-H(12) 0.9500

C(6)-H(6) 0.9500

C(7)-H(7) 0.9500

C(10)-H(10) 0.9500

C(43)-H(0A) 0.9800

C(43)-H(0B) 0.9800

C(43)-H(0C) 0.9800

C(5)-H(5) 0.9500

C(8)-H(8) 0.9500

C(28)-H(28) 1.0000

C(11)-H(11) 0.9500

C(18)-H(18) 0.9500

C(29)-H(29A) 0.9800

C(29)-H(29B) 0.9800

C(29)-H(29C) 0.9800

C(26)-H(26) 0.9500

C(19)-H(19) 0.9500

C(31)-H(31) 1.0000

C(24)-H(24) 0.9500

C(20)-H(20) 0.9500

C(30)-H(30A) 0.9800

C(30)-H(30B) 0.9800

C(30)-H(30C) 0.9800

C(25)-H(25) 0.9500

C(37)-C(35)-H(35) 107.6

C(21)-C(35)-H(35) 107.6

C(36)-C(35)-H(35) 107.6

Pd(1)-C(44)-H(10A) 109.5

Pd(1)-C(44)-H(10B) 109.5

H(10A)-C(44)-H(10B) 109.5

Pd(1)-C(44)-H(10C) 109.5

H(10A)-C(44)-H(10C) 109.5

H(10B)-C(44)-H(10C) 109.5

C(17)-C(39)-H(39) 107.3

C(40)-C(39)-H(39) 107.3

C(38)-C(39)-H(39) 107.3

C(35)-C(37)-H(37A) 109.5

C(35)-C(37)-H(37B) 109.5

H(37A)-C(37)-H(37B) 109.5

C(35)-C(37)-H(37C) 109.5

H(37A)-C(37)-H(37C) 109.5

H(37B)-C(37)-H(37C) 109.5

C(39)-C(38)-H(38A) 109.5

C(39)-C(38)-H(38B) 109.5

H(38A)-C(38)-H(38B) 109.5

C(39)-C(38)-H(38C) 109.5

H(38A)-C(38)-H(38C) 109.5

H(38B)-C(38)-H(38C) 109.5

C(31)-C(41)-H(41A) 109.5

C(31)-C(41)-H(41B) 109.5

H(41A)-C(41)-H(41B) 109.5

C(31)-C(41)-H(41C) 109.5

H(41A)-C(41)-H(41C) 109.5

H(41B)-C(41)-H(41C) 109.5

O(1)-C(46)-H(20A) 109.8

C(45)-C(46)-H(20A) 109.8

O(1)-C(46)-H(20B) 109.8

C(45)-C(46)-H(20B) 109.8

H(20A)-C(46)-H(20B) 108.2

O(1)-C(47)-H(20C) 109.3

C(48)-C(47)-H(20C) 109.3

O(1)-C(47)-H(20D) 109.3

C(48)-C(47)-H(20D) 109.3

H(20C)-C(47)-H(20D) 107.9

C(35)-C(36)-H(36A) 109.5

C(35)-C(36)-H(36B) 109.5

H(36A)-C(36)-H(36B) 109.5

C(35)-C(36)-H(36C) 109.5

H(36A)-C(36)-H(36C) 109.5

H(36B)-C(36)-H(36C) 109.5

C(46)-C(45)-H(20E) 1 09.5

C(46)-C(45)-H(20F) 109.5

H(20E)-C(45)-H(20F) 109.5

C(46)-C(45)-H(20G) 109.5

H(20E)-C(45)-H(20G) 109.5

H(20F)-C(45)-H(20G) 109.5

C(47)-C(48)-H(20H) 109.5

C(47)-C(48)-H(20I) 109.5

H(20H)-C(48)-H(20I) 109.5

C(47)-C(48)-H(20J) 109.5

H(20H)-C(48)-H(20J) 109.5

H(20I)-C(48)-H(20J) 109.5

C(39)-C(40)-H(40A) 109.5

C(39)-C(40)-H(40B) 109.5

H(40A)-C(40)-H(40B) 109.5

C(39)-C(40)-H(40C) 109.5

H(40A)-C(40)-H(40C) 109.5

H(40B)-C(40)-H(40C) 109.5

C(31)-C(42)-H(42A) 109.5

C(31)-C(42)-H(42B) 109.5

H(42A)-C(42)-H(42B) 109.5

C(31)-C(42)-H(42C) 109.5

H(42A)-C(42)-H(42C) 109.5

H(42B)-C(42)-H(42C) 109.5

C(13)-C(12)-H(12) 122.0

C(11)-C(12)-H(12) 122.0

C(11)-C(10)-H(10) 120.8

C(9)-C(10)-H(10) 120.8

C(2)-C(43)-H(0A) 109.5

C(2)-C(43)-H(0B) 109.5

H(0A)-C(43)-H(0B) 109.5

C(2)-C(43)-H(0C) 109.5

H(0A)-C(43)-H(0C) 109.5

H(0B)-C(43)-H(0C) 109.5

C(29)-C(28)-H(28) 107.3

C(30)-C(28)-H(28) 107.3

C(27)-C(28)-H(28) 107.3

C(10)-C(11)-H(11) 118.9

C(12)-C(11)-H(11) 118.9

C(24)-C(25)-H(25) 119.7

C(26)-C(25)-H(25) 119.7

C(19)-C(18)-H(18) 119.1

C(17)-C(18)-H(18) 119.1

C(28)-C(29)-H(29A) 109.5

C(28)-C(29)-H(29B) 109.5

H(29A)-C(29)-H(29B) 109.5

C(28)-C(29)-H(29C) 109.5

H(29A)-C(29)-H(29C) 109.5

H(29B)-C(29)-H(29C) 109.5

C(25)-C(26)-H(26) 119.4

C(27)-C(26)-H(26) 119.4

C(20)-C(19)-H(19) 119.9

C(18)-C(19)-H(19) 119.9

C(42)-C(31)-H(31) 107.7

C(23)-C(31)-H(31) 107.7

C(41)-C(31)-H(31) 107.7

C(25)-C(24)-H(24) 119.1

C(23)-C(24)-H(24) 119.1

C(19)-C(20)-H(20) 119.4

C(21)-C(20)-H(20) 119.4

C(28)-C(30)-H(30A) 109.5

C(28)-C(30)-H(30B) 109.5

H(30A)-C(30)-H(30B) 109.5

C(28)-C(30)-H(30C) 109.5

H(30A)-C(30)-H(30C) 109.5

H(30B)-C(30)-H(30C) 109.5

**III. Computational Data.**

Cartesian coordinates for stationary points

Intermediate A

---------------------------------------------------------------------

Center Atomic Atomic Coordinates (Angstroms)

Number Number Type X Y Z

---------------------------------------------------------------------

1 7 0 2.010571 1.265988 -0.215850

2 6 0 0.720611 1.791524 0.052791

3 7 0 -0.303620 0.895417 -0.043785

4 6 0 -1.570930 1.357013 0.097768

5 7 0 -2.637312 0.475387 -0.198622

6 6 0 -3.964279 0.763091 0.196699

7 7 0 -4.632302 -0.302247 -0.367235

8 6 0 -3.801089 -1.197945 -1.084033

9 6 0 -2.534088 -0.705286 -0.975777

10 1 0 -1.591204 -1.090648 -1.326494

11 1 0 -4.163424 -2.085044 -1.577255

12 1 0 -5.630896 -0.405113 -0.257120

13 6 0 -1.855958 2.689415 0.474242

14 6 0 -0.785733 3.573267 0.637430

15 6 0 0.530499 3.136995 0.397253

16 1 0 1.367171 3.818053 0.494934

17 1 0 -0.970805 4.603215 0.928116

18 1 0 -2.890187 2.978426 0.609429

19 6 0 -0.861527 -2.420674 1.142410

20 6 0 1.764423 -3.040758 0.322907

21 6 0 3.228544 1.974254 -0.335022

22 6 0 4.196519 1.038796 -0.579165

23 7 0 3.548391 -0.210659 -0.600363

24 6 0 2.195566 -0.113837 -0.376197

25 1 0 3.994583 -1.107681 -0.733627

26 1 0 5.255102 1.161700 -0.739987

27 1 0 3.312891 3.044696 -0.258747

28 1 0 1.127552 -3.930436 0.310868

29 1 0 2.464004 -3.076255 -0.527861

30 1 0 2.317211 -2.992064 1.272006

31 1 0 -1.311349 -3.156476 0.457535

32 1 0 -0.429331 -2.955037 1.999625

33 1 0 -1.643376 -1.733268 1.502093

34 46 0 0.637318 -1.326443 0.173905

---------------------------------------------------------------------

Intermediate B

---------------------------------------------------------------------

Center Atomic Atomic Coordinates (Angstroms)

Number Number Type X Y Z

---------------------------------------------------------------------

1 46 0 0.000039 -1.058020 -0.091070

2 7 0 2.268348 0.764217 -0.106097

3 6 0 1.194913 1.657932 -0.014323

4 7 0 -0.000047 0.985089 -0.000506

5 6 0 -1.195025 1.657878 -0.014239

6 7 0 -2.268444 0.764099 -0.105937

7 6 0 -1.987844 -0.623280 -0.321612

8 7 0 -3.258710 -1.181963 -0.294345

9 6 0 -4.269014 -0.225427 -0.098787

10 6 0 -3.656099 0.993168 0.018173

11 1 0 -4.081739 1.967059 0.193465

12 1 0 -5.317184 -0.474890 -0.061810

13 1 0 -3.404914 -2.170943 -0.430907

14 6 0 -1.232824 3.054028 0.029862

15 6 0 -0.000108 3.750942 0.066289

16 6 0 1.232632 3.054091 0.029772

17 1 0 2.173258 3.594997 0.018831

18 1 0 -0.000132 4.836220 0.096874

19 1 0 -2.173479 3.594884 0.019007

20 6 0 0.000459 -1.631606 2.034762

21 6 0 -0.000066 -3.093279 -0.503983

22 6 0 3.655985 0.993310 0.018186

23 6 0 4.268948 -0.225259 -0.098779

24 7 0 3.258704 -1.181822 -0.294478

25 6 0 1.987802 -0.623195 -0.321857

26 1 0 3.404972 -2.170780 -0.431133

27 1 0 5.317122 -0.474689 -0.061687

28 1 0 4.081575 1.967201 0.193598

29 1 0 -0.893626 -3.561490 -0.070183

30 1 0 0.000758 -3.209509 -1.595468

31 1 0 0.892524 -3.561968 -0.068723

32 1 0 -0.903682 -2.222031 2.216345

33 1 0 0.904807 -2.221792 2.216101

34 1 0 0.000423 -0.706506 2.623680

---------------------------------------------------------------------

Transition state C

---------------------------------------------------------------------

Center Atomic Atomic Coordinates (Angstroms)

Number Number Type X Y Z

---------------------------------------------------------------------

1 46 0 0.033635 -1.067269 -0.087924

2 7 0 2.362397 0.638008 -0.005674

3 6 0 1.324075 1.590933 0.004148

4 7 0 0.111355 0.979976 -0.082573

5 6 0 -1.065114 1.681531 -0.097301

6 7 0 -2.156788 0.834064 -0.194875

7 6 0 -1.929188 -0.597366 -0.244758

8 7 0 -3.230515 -1.093988 -0.351880

9 6 0 -4.196956 -0.078987 -0.283463

10 6 0 -3.545365 1.119342 -0.186114

11 1 0 -3.942586 2.117917 -0.113059

12 1 0 -5.256024 -0.278159 -0.323783

13 1 0 -3.417139 -2.079268 -0.453216

14 6 0 -1.042093 3.085531 -0.017114

15 6 0 0.212545 3.722728 0.067163

16 6 0 1.425260 2.980669 0.078460

17 1 0 2.383594 3.484509 0.142698

18 1 0 0.254947 4.806513 0.125059

19 1 0 -1.958177 3.666828 -0.025749

20 6 0 -1.394853 -1.186763 1.935037

21 6 0 0.020624 -3.131830 -0.401464

22 6 0 3.760400 0.815967 -0.012226

23 6 0 4.317446 -0.434002 -0.053001

24 7 0 3.256510 -1.358183 -0.069530

25 6 0 2.016927 -0.747809 -0.044747

26 1 0 3.349836 -2.362942 -0.098707

27 1 0 5.354242 -0.727657 -0.073049

28 1 0 4.233591 1.783464 0.005376

29 1 0 -1.003013 -3.482727 -0.591188

30 1 0 0.648452 -3.385253 -1.267093

31 1 0 0.408876 -3.621298 0.504539

32 1 0 -1.825630 -2.190737 1.911707

33 1 0 -0.484235 -1.138395 2.539126

34 1 0 -2.116939 -0.417212 2.225824

---------------------------------------------------------------------

Product D

---------------------------------------------------------------------

Center Atomic Atomic Coordinates (Angstroms)

Number Number Type X Y Z

---------------------------------------------------------------------

1 46 0 -0.007867 -1.097320 -0.022484

2 7 0 0.213855 0.960254 0.073432

3 6 0 1.440792 1.503274 0.039640

4 7 0 2.451689 0.494767 -0.024287

5 6 0 2.072864 -0.861800 -0.101898

6 7 0 3.285721 -1.501378 -0.154341

7 6 0 4.379566 -0.613375 -0.116498

8 6 0 3.848867 0.647293 -0.035067

9 1 0 4.342053 1.603158 0.019835

10 1 0 5.407004 -0.936367 -0.149753

11 1 0 3.347506 -2.508090 -0.216305

12 6 0 1.642870 2.887141 0.018277

13 6 0 0.466493 3.688643 0.035090

14 6 0 -0.814960 3.130873 0.063649

15 6 0 -0.935969 1.705417 0.080892

16 7 0 -2.072442 0.963246 0.081277

17 6 0 -2.014220 -0.575558 0.301838

18 7 0 -3.167248 -0.990579 -0.543509

19 6 0 -3.931203 0.128767 -0.902283

20 6 0 -3.342437 1.290345 -0.492418

21 1 0 -3.698947 2.303887 -0.590675

22 1 0 -4.871155 0.028918 -1.428630

23 1 0 -3.078744 -1.795173 -1.151272

24 6 0 -2.370304 -0.836480 1.786903

25 1 0 -3.358003 -0.416145 2.036508

26 1 0 -2.397530 -1.917737 1.963231

27 1 0 -1.616389 -0.398807 2.453201

28 1 0 -1.697911 3.760072 0.083532

29 1 0 0.570180 4.770796 0.022519

30 1 0 2.628472 3.334364 -0.028128

31 6 0 -0.303339 -3.143223 -0.216600

32 1 0 0.394021 -3.680284 0.445988

33 1 0 -1.329396 -3.442343 0.039415

34 1 0 -0.094427 -3.421607 -1.262360

---------------------------------------------------------------------
